# Supplementary material for: Neural Mechanisms of Acceptance and Commitment Therapy for Chronic Pain: A Network-Based fMRI Approach
Source: PubMed Central journal article supplement (PMC7892587; doi:10.3389/fnhum.2021.587018), 2021-02-05
Supplement: Table_1.pdf [file Table_1.pdf]

## *Supplementary Material*

**Supplementary Table 1.** Power et al. 2011 nodes were used in graph analyses. Listed below are ROIs corresponding to the DMN, FPN, and SN.

| Power ROI | X   | Y   | Z   | Network      | Region               |
|-----------|-----|-----|-----|--------------|----------------------|
| 74        | -41 | -75 | 26  | Default mode | Occipital_Mid_L      |
| 75        | 6   | 67  | -4  | Default mode | Frontal_Mid_Orb_R    |
| 76        | 8   | 48  | -15 | Default mode | Frontal_Mid_Orb_R    |
| 77        | -13 | -40 | 1   | Default mode | Lingual_L            |
| 78        | -18 | 63  | -9  | Default mode | Frontal_Sup_Orb_L    |
| 79        | -46 | -61 | 21  | Default mode | Temporal_Mid_L       |
| 80        | 43  | -72 | 28  | Default mode | Occipital_Mid_R      |
| 81        | -44 | 12  | -34 | Default mode | Temporal_Pole_Mid_L  |
| 82        | 46  | 16  | -30 | Default mode |                      |
| 83        | -68 | -23 | -16 | Default mode |                      |
| 86        | -44 | -65 | 35  | Default mode | Angular_L            |
| 87        | -39 | -75 | 44  | Default mode | Angular_L            |
| 88        | -7  | -55 | 27  | Default mode | Precuneus_L          |
| 89        | 6   | -59 | 35  | Default mode | Precuneus_R          |
| 90        | -11 | -56 | 16  | Default mode | Precuneus_L          |
| 91        | -3  | -49 | 13  | Default mode | Precuneus_L          |
| 92        | 8   | -48 | 31  | Default mode | Cingulum_Post_R      |
| 93        | 15  | -63 | 26  | Default mode | Precuneus_R          |
| 94        | -2  | -37 | 44  | Default mode | Cingulum_Mid_L       |
| 95        | 11  | -54 | 17  | Default mode | Precuneus_R          |
| 96        | 52  | -59 | 36  | Default mode | Angular_R            |
| 97        | 23  | 33  | 48  | Default mode | Frontal_Sup_R        |
| 98        | -10 | 39  | 52  | Default mode | Frontal_Sup_Medial_L |
| 99        | -16 | 29  | 53  | Default mode | Frontal_Sup_L        |
| 100       | -35 | 20  | 51  | Default mode | Frontal_Mid_L        |
| 101       | 22  | 39  | 39  | Default mode | Frontal_Sup_R        |
| 102       | 13  | 55  | 38  | Default mode | Frontal_Sup_Medial_R |
| 103       | -10 | 55  | 39  | Default mode | Frontal_Sup_L        |
| 104       | -20 | 45  | 39  | Default mode | Frontal_Sup_L        |
| 105       | 6   | 54  | 16  | Default mode | Frontal_Sup_Medial_R |
| 106       | 6   | 64  | 22  | Default mode | Frontal_Sup_Medial_R |
| 107       | -7  | 51  | -1  | Default mode | Cingulum_Ant_L       |
| 108       | 9   | 54  | 3   | Default mode | Frontal_Sup_Medial_R |

|            |     |     |     |                              |                      |
|------------|-----|-----|-----|------------------------------|----------------------|
| 109        | -3  | 44  | -9  | Default mode                 | Frontal_Mid_Orb_L    |
| 110        | 8   | 42  | -5  | Default mode                 | Frontal_Mid_Orb_R    |
| 111        | -11 | 45  | 8   | Default mode                 | Cingulum_Ant_L       |
| 112        | -2  | 38  | 36  | Default mode                 | Frontal_Sup_Medial_L |
| 113        | -3  | 42  | 16  | Default mode                 | Cingulum_Ant_L       |
| 114        | -20 | 64  | 19  | Default mode                 | Frontal_Sup_L        |
| 115        | -8  | 48  | 23  | Default mode                 | Frontal_Sup_Medial_L |
| 116        | 65  | -12 | -19 | Default mode                 |                      |
| 117        | -56 | -13 | -10 | Default mode                 | Temporal_Mid_L       |
| 118        | -58 | -30 | -4  | Default mode                 | Temporal_Mid_L       |
| 119        | 65  | -31 | -9  | Default mode                 | Temporal_Mid_R       |
| 120        | -68 | -41 | -5  | Default mode                 |                      |
| 121        | 13  | 30  | 59  | Default mode                 |                      |
| 122        | 12  | 36  | 20  | Default mode                 | Cingulum_Ant_R       |
| 123        | 52  | -2  | -16 | Default mode                 | Temporal_Mid_R       |
| 124        | -26 | -40 | -8  | Default mode                 | ParaHippocampal_L    |
| 125        | 27  | -37 | -13 | Default mode                 | ParaHippocampal_R    |
| 126        | -34 | -38 | -16 | Default mode                 | Fusiform_L           |
| 127        | 28  | -77 | -32 | Default mode                 | Cerebelum_Crus1_R    |
| 128        | 52  | 7   | -30 | Default mode                 | Temporal_Mid_R       |
| 129        | -53 | 3   | -27 | Default mode                 | Temporal_Mid_L       |
| 130        | 47  | -50 | 29  | Default mode                 | Angular_R            |
| 131        | -49 | -42 | 1   | Default mode                 | Temporal_Mid_L       |
| 137        | -46 | 31  | -13 | Default mode                 | Frontal_Inf_Orb_L    |
| 139        | 49  | 35  | -12 | Default mode                 | Frontal_Inf_Orb_R    |
| <b>174</b> | -44 | 2   | 46  | Fronto-parietal Task Control | Precentral_L         |
| <b>175</b> | 48  | 25  | 27  | Fronto-parietal Task Control | Frontal_Inf_Tri_R    |
| <b>176</b> | -47 | 11  | 23  | Fronto-parietal Task Control | Frontal_Inf_Oper_L   |
| <b>177</b> | -53 | -49 | 43  | Fronto-parietal Task Control | Parietal_Inf_L       |
| <b>178</b> | -23 | 11  | 64  | Fronto-parietal Task Control | Frontal_Sup_L        |
| <b>179</b> | 58  | -53 | -14 | Fronto-parietal Task Control | Temporal_Inf_R       |
| <b>180</b> | 24  | 45  | -15 | Fronto-parietal Task Control | Frontal_Sup_Orb_R    |
| <b>181</b> | 34  | 54  | -13 | Fronto-parietal Task Control | Frontal_Mid_Orb_R    |
| <b>186</b> | 47  | 10  | 33  | Fronto-parietal Task Control | Frontal_Inf_Oper_R   |
| <b>187</b> | -41 | 6   | 33  | Fronto-parietal Task Control | Precentral_L         |
| <b>188</b> | -42 | 38  | 21  | Fronto-parietal Task Control | Frontal_Mid_L        |
| <b>189</b> | 38  | 43  | 15  | Fronto-parietal Task Control | Frontal_Mid_R        |
| <b>190</b> | 49  | -42 | 45  | Fronto-parietal Task Control | SupraMarginal_R      |
| <b>191</b> | -28 | -58 | 48  | Fronto-parietal Task Control | Parietal_Sup_L       |

|            |     |     |    |                              |                      |
|------------|-----|-----|----|------------------------------|----------------------|
| <b>192</b> | 44  | -53 | 47 | Fronto-parietal Task Control | Parietal_Inf_R       |
| <b>193</b> | 32  | 14  | 56 | Fronto-parietal Task Control | Frontal_Mid_R        |
| <b>194</b> | 37  | -65 | 40 | Fronto-parietal Task Control | Angular_R            |
| <b>195</b> | -42 | -55 | 45 | Fronto-parietal Task Control | Parietal_Inf_L       |
| <b>196</b> | 40  | 18  | 40 | Fronto-parietal Task Control | Frontal_Mid_R        |
| <b>197</b> | -34 | 55  | 4  | Fronto-parietal Task Control | Frontal_Mid_L        |
| <b>198</b> | -42 | 45  | -2 | Fronto-parietal Task Control | Frontal_Mid_Orb_L    |
| <b>199</b> | 33  | -53 | 44 | Fronto-parietal Task Control | Parietal_Inf_R       |
| <b>200</b> | 43  | 49  | -2 | Fronto-parietal Task Control | Frontal_Mid_Orb_R    |
| <b>201</b> | -42 | 25  | 30 | Fronto-parietal Task Control | Frontal_Inf_Tri_L    |
| <b>202</b> | -3  | 26  | 44 | Fronto-parietal Task Control | Frontal_Sup_Medial_L |
| <b>203</b> | 11  | -39 | 50 | Saliency                     | Cingulum_Mid_R       |
| <b>204</b> | 55  | -45 | 37 | Saliency                     | SupraMarginal_R      |
| <b>205</b> | 42  | 0   | 47 | Saliency                     | Precentral_R         |
| <b>206</b> | 31  | 33  | 26 | Saliency                     | Frontal_Mid_R        |
| <b>207</b> | 48  | 22  | 10 | Saliency                     | Frontal_Inf_Tri_R    |
| <b>208</b> | -35 | 20  | 0  | Saliency                     | Insula_L             |
| <b>209</b> | 36  | 22  | 3  | Saliency                     | Insula_R             |
| <b>210</b> | 37  | 32  | -2 | Saliency                     | Frontal_Inf_Orb_R    |
| <b>211</b> | 34  | 16  | -8 | Saliency                     | Insula_R             |
| <b>212</b> | -11 | 26  | 25 | Saliency                     | Cingulum_Ant_L       |
| <b>213</b> | -1  | 15  | 44 | Saliency                     | Supp_Motor_Area_L    |
| <b>214</b> | -28 | 52  | 21 | Saliency                     | Frontal_Mid_L        |
| <b>215</b> | 0   | 30  | 27 | Saliency                     | Cingulum_Ant_L       |
| <b>216</b> | 5   | 23  | 37 | Saliency                     | Cingulum_Mid_R       |
| <b>217</b> | 10  | 22  | 27 | Saliency                     | Cingulum_Ant_R       |
| <b>218</b> | 31  | 56  | 14 | Saliency                     | Frontal_Sup_R        |
| <b>219</b> | 26  | 50  | 27 | Saliency                     | Frontal_Mid_R        |
| <b>220</b> | -39 | 51  | 17 | Saliency                     | Frontal_Mid_L        |

**Supplementary Table 2.** ACT Intervention, weekly ACT session topics and objectives.

|               | <b>Session Topic</b>                     | <b>Session Objective</b>                                                               | <b>Homework Assignment</b>                                                                                                                                                                        |
|---------------|------------------------------------------|----------------------------------------------------------------------------------------|---------------------------------------------------------------------------------------------------------------------------------------------------------------------------------------------------|
| <b>Week 1</b> | Introductions & Foundations of Treatment | Examine pain duration and analyze past treatment                                       | Creative Hopelessness & Mindfulness Practice: Monitor negative experiences/thoughts, and responses to those experiences throughout the week. Complete 3 five-minute mindfulness practice sessions |
|               | Setting a Course for Treatment           | Introduce behavioral model; in-vivo mindfulness practice                               | Check-in with yourself: Take 10-15 minutes each day to notice and observe.                                                                                                                        |
| <b>Week 2</b> | “Learning to Live” with Chronic Pain     | Introduce/identify acceptance and values; in-vivo mindfulness practice                 | Values assessment: Identify personal values, rank importance and success                                                                                                                          |
|               | Values and Action                        | Values clarification and goal setting; identify barriers; in-vivo mindfulness practice | Goals and action: Identify values and goals consistent with each value                                                                                                                            |
| <b>Week 3</b> | Urges, Thoughts, & Feelings              | Defusion of threats/barriers; in-vivo mindfulness practice                             | Observing your actions: Track actions and observations throughout the week                                                                                                                        |
|               | Action – Getting Your Feet Moving        | Committed action; in-vivo mindfulness practice                                         | Commit yourself to action: Track progress, difficulties, and experiences and review throughout the week                                                                                           |
| <b>Week 4</b> | Commitment                               | Acceptance, willingness, and barriers to willingness; in-vivo mindfulness practice     | Mindfulness practice: Try new ways to practice mindfulness in daily life                                                                                                                          |
|               | Lifelong Maintenance                     | Values clarification; dealing with relapses and setbacks; review treatment plan        | Lifelong assignment: Continued values and goals assessment; mindfulness practice                                                                                                                  |

**Description of the ACT therapist training process can be accessed at:**

Aytur, S., Campbell, C., Meier, S., et al. (2019). Broadening the scope of Acceptance and Commitment Therapy as a public health intervention for persons with chronic pain. Presented at the American Public Health Association annual conference, Philadelphia, PA, Nov. 5, 2019.

<https://apha.confex.com/apha/2019/meetingapp.cgi/Paper/453678>

**Supplementary Figure 1.** ACT Intervention, structure of each ACT session.

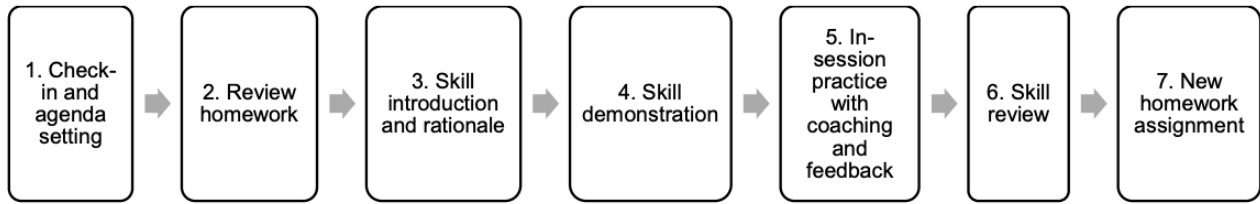

**Supplementary Table 3.** Behavioral assessments.

| <b>Battery/Assessment</b>                                                                                                                                                                                                                                                                                                                          |
|----------------------------------------------------------------------------------------------------------------------------------------------------------------------------------------------------------------------------------------------------------------------------------------------------------------------------------------------------|
| Center for Epidemiologic Studies Depression Scale (CES-D; Radloff, 1977)                                                                                                                                                                                                                                                                           |
| Brief Pain Inventory (BPI; Cleeland & Ryan, 1994)                                                                                                                                                                                                                                                                                                  |
| Acceptance & Action Questionnaire (AAQ-II; Bond et al., 2011)                                                                                                                                                                                                                                                                                      |
| Chronic Pain Acceptance Questionnaire (CPAQ; Vowles et al., 2011)                                                                                                                                                                                                                                                                                  |
| Patient-Reported Outcomes Measurement Information System (PROMIS ®; Cella et al., 2010): Pain Interference, Pain Intensity, Pain Behavior                                                                                                                                                                                                          |
| Quality of Life in Neurological Disorders (Neuro QoL; Cella et al., 2012) - Short Forms: Cognitive Function, Satisfaction with Social Roles and Activities, Stigma, Sleep, Positive Affect and Well-Being, Fatigue, Emotional and Behavioral Dyscontrol, Depression, Anxiety, Ability to Participate in Social Roles and Activities, Communication |

Supplementary Table 4. Patient Characteristics.

| Patient ID                               | 1                                                                                          | 2                                                                                                                             | 3                                                                                                                                             | 4                                                            | 5                          | 6                                                                                                                                | 7                  | 8                                           | 9                                                                                              |
|------------------------------------------|--------------------------------------------------------------------------------------------|-------------------------------------------------------------------------------------------------------------------------------|-----------------------------------------------------------------------------------------------------------------------------------------------|--------------------------------------------------------------|----------------------------|----------------------------------------------------------------------------------------------------------------------------------|--------------------|---------------------------------------------|------------------------------------------------------------------------------------------------|
| Age (years)                              | 66.33                                                                                      | 38.33                                                                                                                         | 61.08                                                                                                                                         | 62.08                                                        | 20.49                      | 53.54                                                                                                                            | 45.22              | 60.13                                       | 21.1                                                                                           |
| Chronic Pain Diagnosis/Condition(s)      | fibromyalgia<br><br>trigeminal neuralgia; cervical spinal stenosis; lumbar spinal stenosis | fibromyalgia<br><br>diagnosed 2 yrs. after being in car-accident in 2007 (sustained injuries possibly resulting in condition) | chronic neck/shoulder/between shoulder pain; living at 5 (pain level); always has had issues throughout adulthood; injured at gym 1.5 yrs ago | lower back pain (injured 4 yrs ago); muscular, tight, spasms | Conradi Hunermann Syndrome | car accident (3 yrs ago), broken hip; has led to full body musculo-skeletal issues; spinal arthritis; nerve damage down left leg | fibromyalgia       | fibromyalgia                                | Ehlers-Danlos syndrome; hyper-flexibility causes joints to be easily dislocated, muscle spasms |
| Comorbid Conditions                      | cataracts                                                                                  | food allergies                                                                                                                | depression, anxiety                                                                                                                           | depression                                                   | none                       | anxiety, panic attacks, depression, PTSD                                                                                         | depression         | depression, PTSD (military-related)         | depression, ADD                                                                                |
| Occupation                               | college professor; recently retired                                                        | former early educator (pre-school); now college student                                                                       | college professor, part-time, semi-retired                                                                                                    | college professor                                            | college student            | small business owner                                                                                                             | college instructor | environment/safety science company employee | recently graduated high school; planning to attend college                                     |
| Alternative treatments tried in the past | Physical therapy (PT), pool exercises, mindfulness (many years ago; followed a book)       | 3 yrs ago - acupuncture; 2009 - chiropractic care                                                                             | chiropractic care, acupuncture, therapeutic massage                                                                                           | therapeutic massage                                          | dry needling               | chiropractic care                                                                                                                | none               | PT, heated pool exercise                    | PT, heated pool exercise                                                                       |

|                                                                                              |                                                       |       |       |       |                                                                                                                                                                                                                                                                                                       |                                                                                                         |                   |                            |       |
|----------------------------------------------------------------------------------------------|-------------------------------------------------------|-------|-------|-------|-------------------------------------------------------------------------------------------------------------------------------------------------------------------------------------------------------------------------------------------------------------------------------------------------------|---------------------------------------------------------------------------------------------------------|-------------------|----------------------------|-------|
| <b>Surgeries</b>                                                                             | right wrist - plates & screws; 2 rotator cuff repairs | none  | none  | none  | multiple hip and spinal surgeries over past 15 years including: posterior spinal fusion- 2013; 2014 - translational calcaneal osteotomy; 2018 - translational calcaneal osteotomy & removal; 2018 - femoral head/neck osteochondroplasty, relative femoral neck lengthening, surgical hip dislocation | 27 years ago - caesarian section; 20 years ago labrum tear - hip rebuild; 2 years ago - hip arthroscopy | caesarian-section | 14 yrs ago - breast cancer | none  |
| <b>Length of Pain (years)</b>                                                                | 30                                                    | 12    | 1.5   | 4     | 5                                                                                                                                                                                                                                                                                                     | 3.2                                                                                                     | 4.5               | 15                         | 3     |
| <b>Medications (opiates)</b><br><br>*No new medications were started during the study period | Tylenol #3 with Codeine                               | none  | none  | none  | none                                                                                                                                                                                                                                                                                                  | none                                                                                                    | none              | none                       | none  |
| <b>BMI</b>                                                                                   | 24.40                                                 | 22.10 | 25.80 | 24.10 | 20.00                                                                                                                                                                                                                                                                                                 | 21.60                                                                                                   | 22.90             | 27.50                      | 32.80 |
| <b>Race/ethnicity (1- white, 2- middle eastern)</b>                                          | 1                                                     | 1     | 1     | 1     | 1                                                                                                                                                                                                                                                                                                     | 2                                                                                                       | 1                 | 1                          | 1     |
| <b>Education (years)</b>                                                                     | 17.5                                                  | 19    | 18    | 18    | 14                                                                                                                                                                                                                                                                                                    | 12                                                                                                      | 19                | 18                         | 12    |
